# Supplementary material for: Retrocopying expands the functional repertoire of APOBEC3 antiviral proteins in primates
Source: bioRxiv preprint, doi:10.1101/2020.02.12.944629, version 2 (2020-05-05)
Supplement: File S1 [file 944629_file09.txt]

>Homo_sapiens_NC_000012.12
MKPQIRNLMEWMYPGTFYYNFENRPILSGWNTTWLCYKMKTKK-DPS-KPPLDARIFGGQVYSKPEHHPEMRFVDWFCNSRLHRDQDYLV-IWYISWSPCSEYAGNVAEFLAKDGKVTLTIFVAHLYYFWEADYQEELHR-WCQKK\SPHASMKIMNYDEFQHCWDKFVYNQRMLFDPWKQLNTNYALLHSMLGEILRH-----\FTYNFTND--PSVSGQHQTYLCCKVECQNNDAWVPLDQQ\KGILPSQALNNLSCY*DFHAEQCFLYLISFWKLDRAQCYRVTWFISWSPCFSCAQQVATFHWENRCVSLHIFAACIYNYLPGYE-GLCMLQRAGTQISIMTS/KFRHCWVTFVDHQGCPFQPWDGLDEHSQALSGRLQAILQNQEN
>Pan_paniscus_NW_014014191.1
MKPQIRNLMEWMYPGTFYYNFENRPILSGWNTTWLCYKMKTKK-DPS-KPPLDARIFGGQVYSKPEHHPEMRFVDWFCNSRLHRHQDYLV-IWYISWSPCPEYAGNVAEFLAKDGKVTLTIFIAHLYYFWEADNQEELHR-RCQKK\SPHASMKIMNYDEFQHCWDKFVYNQSMVFDPWKQLNTNYALLHSMLGEILRH-----\FTYNFTND--PSVSGQHQTYLCYKVECQNNDAWVPLDQN-KGILPSQALNNLSCY*DFHAEQCFLYLISFWKLDRAQCYRVTWFISWSPCFSCAQQVATFHWENRCVSLHIFAACIYNYLPGYE-GLCMLQRAGTQISIMTS/KFRHCWVTFVDYQGRPFQPWDGLDEHSQALSGRLQAILQNQEN
>Pan_troglodytes_NW_015972477.1
MKPQIRNLMEWMYPGTFYYNFENRPILSGWNTIWLCYKMKTKK-DPS-KPPLDARIFGGQVYSKPEHHPEMRFVDWFCNSRLHRHQDYLV-IWYISWSPCPEYAGNVAEFLAKDGKVTLTIFIAHLYYFWEADNQEELHR-RCQKK\SPHASMKIMNYDEFQHCWDKFVYNQSMVFDPWKQLNTNYALLHSMLGEILRH-----\FTYNFTND--PSVSGQHQTYLCYKVECQNNDAWVPLDQN-KGILPSQALNNLSCY*DFHAEQCFLHLISFWKLDRAQCYRVTWFISWSPCFSCAQQVATFHWENRCVSLHIFAACIYNYLPGYE-GLCMLQRAGTQISIMTS/KFRHCWVTFVDHQGRPFQPWDGLDEHSQALSGRLQAILQNQEN
>Gorilla_gorilla_NC_018436.1
MKPQIRNLMEWMYPGTFYYNFENRPILSGWNTTWLCYKMKTKK-DPS-KPPLDARIFGGQVYSKPEHHPEMRFVDWFCNSRLHHDQDYLV-IWYISWSPCPEYAGNVAEFLAKDGKVTLTIFVAQLYYFWEADYQEELHR-RCQKK\SPHASMKIMNYDEFQHCWDKFVYNQRMLFDPWKQLNTNYALLHSMLGEILRH-----\FTYNFTND--PSVSGQHQTYLCYKVECQNNDAWVPLDQH-KGILPSQALNNLSCY*DFHVEQCFLYLISFWKLDRAQCYRVTWFISWSPCFSCAQQVATFHWENRCVSLHIFAACIYNYLPGYE-GPCMLQRAGTQISIMTS/KFRHCWVTFVDHQGRPFQPWDGLDEHSQALSGRLQAILQNQEN
>Pongo_abelii_NW_002886061.1
MKPQIRNLMEWMYPGTFYYNFENRPILSGWNTTWLCYKMKTKK-DPS-KPPLDARIFGGQVYSKPEHHPEMRFVDWFYNSRLHCDQDYLL-IWYVSWSPCPEYAGNVAEFLAKDGKVTLTIFV/HLYYFWEPDYQEQLHR-RCQKK\SPHASMKIVNYDEFQHCWDKFVYNQRMLFDPWKQLNTNYALLPSMLGEILRHLVDPRTFTYNFTND--PSVSGQHHTYLCYKVECQNNDTWVSLDQH-KGILPNQALNNLSCY*DFQAEQCFLYLTSFGRLDRAQCYRVTWFISWSPCFSCSQQVATFHWENRRVSLHIFAAHIYNYLPGYE-GLCTLQRAGTQISIMTS/KFRHCWVSFVDHKGCPFQPWNGLDDHSQALSGRLQAILQNQEN
>Nomascus_leucogenys_NC_019825.1
MKPQIRNLMEGMYPGTFYYNFENRPILSGWNTTWLCYKMKTKK-DPS-KPPLDARIFGGQVYSKPEHHLEMRFVDWFCN*RLHHDQDYLV-IWYMSWSPCPEYAGNVAEFLAKDGKVTLTIFVAHLYYFWEPDYQEELHR-RCQKK\SPHASMNIMNYDEFQHCWDKFVYNQRMLFDPWKQLNTNYALLHSMLGEILRHLVDPGTFTYSFTND--PSVSGQHQTYLGYKVECQNNDTLVPLDQH-KGI/PNQALNNLSCY*DFHAEQCFLYLISFWKLDWAQCYRVTwfiswspcfSCAQQAATFHWENRRVSLHIFAAHIYNYLPGYE-GQCTLQRAGTHISIMTS/KFRHCWVTFVGHQGRHLQPWDGLDEHSQALSGRLQAVLQNQEN
>Colobus_angolensis_NW_012110919.1
MKPQIRNPMEWMYPGTFYYNFENRSILSGWNTTWLCHKVKTKK-DPS-KLPLDTRIFGGQVY-QTYHHPEMRSLDWFCN*RLHLDQDYLV-IWYVSWSPWPEYAEKVAEFLAKNGKVTLTIFVPHLYYFWEPDYQEELHR-WCQKK\SPHASMTIMN\DEFQHCWDKFVYSQRMLFDPWKQLNTNYALLHSMLGEIPRHLMDPDTFTYNFTND--PSVSGQHQTYLCYKVECHDNDTWVPLDQH-KGILLNQALNNLSCY*DFYAEQYFLYLISFWKLDRAQCCRVTWFISWSTCFSCAQQVATFHWENRCVSLHIFIARIYN*LPGYE-GLCMLQRAGTQISIMTS/KFRHCWVTFVDHQGHPFQPWDGLDEHSQVLSGRLQAILQNQEN
>Mandrillus_leucophaeus_NW_012101554.1
VKPQIRNPMEWMCPGTFYYNFENRSILSGWNTTWLCHKVKTKK-DPS-KLPLDTRIFGGQVY-QT*HHPEMRFLDLFCN*RLHRDQDYLV\SDNVSRSPCPEYAEKVAEFLVKNGKVTLTIFVAHLYYFWEPDYQEELHR-WCQKK\SPHASMTIMNYDEFQHCWDKFVYNQRMLFDPWKQLNTNYALLHSMLGEIPRHLMDPGTFTYNFTND--PSVSGQHQTYLCYKVECHDNDTWVPLDQH-KGILPNQALNNFSCY*DFHAEQYFLYLISFWKLDRAQCYRVTWFISWSTCFSCAQQVATFHWENRCVSLHIFVARIYNYLPGYE-ALCMLQRAGTQISIMTS/KFRHCWVTFVDHEGHPFQPWDGLDEHSQALSGRLQAILQNQEN
>Cercocebus_atys_NW_012003393.1
VKPQIRNPMEWMCPGTFYYNFENRSILSGWNTTWLCHKVKTNK-DPS-KLPLDTRIFGGQVY-QT*HHPEMRFLDWFCN*RRRRDQDYLV-I*YVSRSPCPEYAEKVAEFLVKNGKVTLTIFVAHLYYFWEPDYQEELHR-WCQKK\SPHASMTIMNYDEFQHCWDKFVYNQRMLFDPWKQLNTNYALLHSMLGEIPRHLMDPGTFTYNFTND--PSVSGQHQTYLCYKVECHDNDTWVPLDQH-KGILPNQALNNLSCY*DFHAEQYFLYLISFWKLDRAQCYRVTWFISWSTCFSCAQQVATFHWENRCVSLHIFIARIYNYLPGYE-GLCMLQRAGTQISIMTS/KFRHCWVTFVDHEGHPFQPWDGLDEHSQALSGRLQAILQNQEN
>Papio_anubis_NC_018162.1
VKPQIRNPMEWMCPGTFYYNFENRSVLSGWNTTWLCHKVKTKK-DPS-KLPLDTRIFGGQVY-QT*HHPEMRFLDWFCN*RRHRDQDYLV-I*YISRSPCPEYAEKVAEFLVKNGKVTLTIFVAHLYYFWEPDYQKEPHR-WCQKK\SPHASMTIMNYDEFQHCWDKFVYNQRMLFDPWKQLNTNYALLHSMLGEIPRHLMDPGTFTYNFTND--PSVSGQHQTYLCYKVECHDNDTWVPLDQH-KGILPNQALNNLSCY*DFHAEQYFLYLISFWKLDQAQCYRVTWFISWSTCFSCAQQVATFHWENRCVSLHIFIARIYNYLPGYE-GLCMLQRAGTQISIMTS/KFRHCWVTFVDHEGHPFQPWDGLDEHSQALSGRLQAILQNQEN
>Chlorocebus_sabaeus_NC_023652.1
----------WMYPGTFYYSFENRSILSGWNTTWLCHKVKTKK-DPS-KLPLDTRIFGGQVY-QT*HHPEMRFLDWFCN*RLHRDQDYLV-IWYVSWSPCLEYAEKVAEFLAKNGKVSLTIFVAHLYYFWEPDYQEELHR-WCQKK\SPHASMTIMNYDEFQHCWDKFVYNQRMLFDPWKQLNTNYALLHSMLGEIPRHLMDPDTFTYNFTND--PSVSGHHQTYLCFKVECHDNDTWVPLDQH-KVILPNQALNNLSCY*DFHAEQYFLYLISFWKLDRAQCYRVTSFISWSTCFSCVQQVATFHWENRCVSLHIFVARMYNYLPGYE-GLCMLQRAGTQISIMTS/KFRHCWVTFVDHQGHPFQPWDGLDEHSQVLSGRLQAILQNQEN
>Macaca_mulatta_NW_014805304.1
MKPQIRNPMEWMCPGTFYYNFENRSILSGWNTTWLCHKVKTKK---------DTRIFGGQVY-QT*HHPEMRFLDWFCN*RLHRDQDYLV-I*YVSRNPCPEYAEKVAEFLVKNGKVTLTIFVAHLYYFWEPDYQEELHR-WCQKK\SPHASMTIMNYDEFQHCWDKFVYNQRMLFDPWKQLNTNYALLHSMLGEIPRHLMDPGTFTYNFTND--PSVSGQHQTYLCYKVECHDNDTWVPLDQH-KGILPNQALNNLSCY*DFHAEQYFLYLISFWKLDRAQCYRVTWFISWSTCFSCAQQVTTFHWENRCVSLHIFVACIYNYLPGYE-GLCMLQRAGTQISIMTS/KFRHCWVTFVDHEGHPFQPWDGLDEHSQALSGRLQAILQNQEN
>Macaca_fascicularis_NC_022282.1
MKPQIRNPMEWMCPGTFYYNFENRSILSGWNTTWLCHKVKTKK---------DTRIFGGQVY-QT*HHPEMRFLDWFCN*RLHRDQDYLV-I*YVSRSPCPEYAEKVAEFLVKNGKVTLTIFVAHLYYFWEPDYQEELHR-WCQKK\SPHASMTIMNYDEFQHCWDKFVYNQRMLFDPWKQLNTNYALLHSMLGEIPRHLMDPGTFTYNFTND--PSVSGQHQTYLCYKVECHDNDTWVPLDQH-KGILPNQALNNLSCY*DFHAEQYFLYLISFWKLDRAQCYRVTWFISWSTCFSCAQQVTTFHWENRCVSLHIFVARIYNYLPGYE-GLCMLQRAGTQISIMTS/KFRHCWVTFVDHEGHPFQPWDGLDEHSQALSGRLQAILQNQEN
>Macaca_nemestrina_NW_012013611.1
VKPQIRNPMEWMCPGTFYYNFENRSILSGWNTTWLCHKVKTKK---------DTRIFGGQVY-QT*HHPEMRFLDWFCN*RLHRDQDYLV-I*YVSRSPCPEYAEKVAEFLVKNGKVTLTIFVAHLYYFWEPDYQEELHR-WCQKK\SPHASMTIMNYDEFQHCWDKFVYNQRMLFDPWKQLNTNYALLHSMLGEIPRHLMDPGTFTYNFTND--PSVSGQHQTYLCYKVECHDNDTWVPLDQH-KGILPNQALNNLSCY*DFHAEQYFLYLISFWKLDRAQCYRVTWFISWSTCFSCAQQVTTFHWENRCVSLHIFVARIYNYLPGYE-GLCMLQRAGTQISIMTS/KFRHCWVTFVDHEGHPFQPWDGLDEHSQALSGRLQAILQNQEN
>Rhinopithecus_bieti_NW_016806995.1
MKPQIRNPMEWMYPGTFYYNFENRSILSGWNTTWLCHKVKTKK-DPS-KLPLDTRIFGGQVY-QT*HHPEMRFLDWFCN*RLHHD*DYLV-IWYVSWSPWPEYAEKVAEFLAKNGKVTLTIFVAHLYYFWEPDYQEELHRWWCQKK\SPHASMTIMNYDEFQHCWDKFVYNQRMQFDPWKQLNTNYALLHSMLGEIPKHLMDPDTFTYNFTND--PSVSGQHQTYLCYKVECHDNDTWVPLDQH-KGILPNQALNKISCY*DFHAEQYFLYLISFWKLDRAQCYRVTWFISWSTCFSCAQQVATFHWENRCVSLHIFVACIYNYFPGYE-GLCMLQRAGTQISIMTS/KFRHCWVTFVDHQGHPFQPWDGLDEHSQVLSGRLQAILQNQEN
>Rhinopithecus_roxellana_NW_010786848.1
MKPQIRNPMEWMYPGTFYYNFENRSILSGWNTTWLCHKVKTKK-DPS-KLPLDTRIFGGQVY-QT*HHPEMRFLDWFCN*RLHHD*DYLV-IWYVSWSPWPEYAEKVAEFLAKNGKVTLTIFVAHLYYFWEPDYQEELHRWWCQKK\SPHASMTIMNYDEFQHCWDKFVYNQRMRFDPWKQLNTNYALLHTMLGEIPKHLMDPDTFTYNFTND--PSVSGQHQTYLCYKVECHDNDTWVPLDQH-KGILPNQALNNLSCY*DFHAEQYFLYLISFWKLDRAQCYRVTWFISWSTCFSCAQQVATFHWENRCVSLHIFVACIYNYFPGYE-GLCMLQRAGTQISIMTS/KFRHCWVTFVDHQGHPFQPWDGLDEHSQVLSGRMQAILQNQEN
>Callithrix_jacchus_NW_003183884.1
MKPQIRNPTEWIYTGTIYYDSENRPFLSGWNTTWLCYKVKTKK\DPS-KPPLDTRIFGGEVYSKPEYHSEMRFLGWF*NWKQHGDQDYLV-PWYVSWSPCPEYAGNVAEF*AKDGKVTLTIFVVHLYYLLEPDYQEEIHR-S\QRKDSPHASMKIINYDEFQHHWNASVYNPRMLFEP*KKLNTNYALLHSMLGEILRHLMDPGTLAYDFTNDQ\PSVSGQHQTYLCYQAERRDSD\--TLDQQ-KGILPNQTLNNLSCY*GFHAEKCFLYLISFWKLEWAQCYRVPwfiswspcfSCVQQVAAFSWENRHVNLHIFTAHIYDDLPGYEEGLYMLLMAGTQISIMTSGKFRHCWDTFVDHQRCPFQP*SGLDEHSQALSGRL*VVLQNQEN
>Cebus_capucinus_NW_016107323.1
MKPQIRNPMEWMYTGTVYYDSEKRPILSGWN/TWLYYKVKTKK\DPS-KPLSDTRIFGGEVYSKLEYHSEMRFLDWF*NWKQHGD*DYLV-S*YVSWSPCPEYAGNVAEFQAKDGKVTLTTFIVHLYRFLEPDYQEELHR-W\QRKDSPHASMKIINYDEFQHHWTGSVYSQRMLSKPWKKLNTNYALLHSMLGEILRHLMDPGTFAYDFTND--PSVSGQHQTYLCYKVERRDSD\--SLDQQ-KCILPNQTLSNLSCY*GFYAEKCFLYLISFWKLDWAQCYRVTWFFS*SPCFSCTQQVAAFPWENRHVSLHIFTAHIYDYLLGYEEGLYTLLRAGTQLSVMTSRKFRHCWDTFVDHQRCPF*PWSGLDEHS*ALSGRL*VILQNQEN
>Aotus_nancymaae_NW_012183868.1
MKPQIRNPTEWMYTGTIYYDSENRPILSGWNTTWLCYKVKTKK\DPS-KLPLDTRIFGGEVYSKPEYHSEMRFLDWF*NWKQHGDQDYLV-PWYVSWSPCPEYAGNVAEFQAKDGKVTLIIFVVHLYYFLEPDYQEELHR-W\QRKDSLHASMKVINYDEFQHHWNGSVDNQRMLFEPWKKLNTNYALLHSMLEEILRHLMDPGTLAYDFT/D--PSVSGQHQAYLCYKVEHHDSD\--PLDQQ-KGILPNQTLNNLSCY*GFHAEKCFLYLISFWKLDRAQCYRVTWFISWSPCFNCARQVAAFPWENRHVSLHIFAAHIYDYLPGYEEGLYMLLRAGTQISIMTSRKFRHCWGTFVDHQRCPFQPWSGLDEHSQALSGRL*VILQNQEN
>Saimiri_boliviensis_NW_003943652.1
IKPQIRNPMEWTYTGTI*YNSENRPILSGWNTTWLCYKVKTKK\DPS\KPPLDTRIFGGEVCCKPEYHSEMRFLDWFRNWKQHGDQDYLV-SWYVSWSPCPEYAGNVAEFQAKDGKVTLTIFVVYLYHFLEPDYQEELRR-L\QRKDSLHASTKIVNYDEFQHHWNGSVYNQRILFEPWKKLNTNYALLHSMLGEILRHLMDPGTFAYDFTND--PSVSGQHQTYLCYKVEHGDSD\--SLD*Q-KGILPNQTLNNLSCY*GFHAEKCFLYLISFWKLDRAQCYRVTWLISWSPCFSCAQQVAAFPWENRHVSLHIFVAHIYDYLLGHEAGLYMLLRAGTQISIMTSRKFKHCWDTFVDHQRSPFQPWNGFDEHSQALTGRL*VILQN---
>A3G(Callithrix_jacchus_NC_013914.1)
MKPQTRNTVARMEPDTFFYSFYNRPILSHWNTVWLCYEVKMKTNDRS-RPPLVAKILQGQVYSKPQHHPEMRFLHWFRKWKLRSDQEYEV-TWFVSWSPCPVCARNVAEFLAEDGKVTLTIFVARLYYFWDPHYREELRR-LCQRRDSPHATMKIMSYGEFQHCWDKFVGNQR-LYKPWNKLPKHYTLLRITLGEVLRHLMDPGTFTYNFSND--PSVLGQHQTYLCYEVEHLHNGTWVPLHQH-RAFIFNEASNNPAFPEGRHAELCLLDLISFWKLDLAQRYRVTCFISWSPCFSCAEKVAEFLQENPHVNLHIFAARIYGYQRGYKKGLRRLNRAGALISMMKYSEFKHCWDIFVDHQGHPFQPWEGLDEHSQALSGRLQAILQ--GN
