# Supplementary material for: Retrocopying expands the functional repertoire of APOBEC3 antiviral proteins in primates
Source: bioRxiv preprint, doi:10.1101/2020.02.12.944629, version 2 (2020-05-05)
Supplement: Table S2 [file 944629_file08.xlsx]

## Sheet: All RNA-seq SRA
SRA	SRX4055825	SRX4055826	SRX4055827	SRX347653	SRX347654	SRX347655	SRX347656	SRX3088670	SRX843210	SRX843209	SRX843208	SRX843207	SRX843211	SRX1096850	SRX1096851	SRX1096852	SRX1096853	SRX1096854	SRX1096855	SRX1096856	SRX1096857	SRX842697	SRX842698	SRX842699	SRX842700	SRX3088671	SRX3088674	SRX4055828	SRX4055829	SRX4055830	SRX347657	SRX347658	SRX3088672	SRX843213	SRX843212	SRX3088673	SRX842693	SRX842694	SRX842695	SRX842696	SRX4055831	SRX4055832	SRX4055833	SRX347659	SRX347660	SRX3088666	SRX843214	SRX4055834	SRX4055835
Tissue	brain	brain	brain	brain	brain	brain	brain	brain	brain	brain	brain	brain	colon	ESC	ESC	ESC	ESC	ESC	ESC	ESC	ESC	ESC	ESC	ESC	ESC	eye	eye	heart	heart	heart	heart	heart	heart	heart	heart	intestine	IPSC	IPSC	IPSC	IPSC	kidney	kidney	kidney	kidney	kidney	kidney	kidney	liver	liver
Species	Callithrix jacchus	Callithrix jacchus	Callithrix jacchus	Callithrix jacchus	Callithrix jacchus	Callithrix jacchus	Callithrix jacchus	Callithrix jacchus	Callithrix jacchus	Callithrix jacchus	Callithrix jacchus	Callithrix jacchus	Callithrix jacchus	Callithrix jacchus	Callithrix jacchus	Callithrix jacchus	Callithrix jacchus	Callithrix jacchus	Callithrix jacchus	Callithrix jacchus	Callithrix jacchus	Callithrix jacchus	Callithrix jacchus	Callithrix jacchus	Callithrix jacchus	Callithrix jacchus	Callithrix jacchus	Callithrix jacchus	Callithrix jacchus	Callithrix jacchus	Callithrix jacchus	Callithrix jacchus	Callithrix jacchus	Callithrix jacchus	Callithrix jacchus	Callithrix jacchus	Callithrix jacchus	Callithrix jacchus	Callithrix jacchus	Callithrix jacchus	Callithrix jacchus	Callithrix jacchus	Callithrix jacchus	Callithrix jacchus	Callithrix jacchus	Callithrix jacchus	Callithrix jacchus	Callithrix jacchus	Callithrix jacchus
A3G	11	15	14	9	4	6	11	23	18	110	21	310	129	141	77	72	38	42	35	69	52	2	9	6	14	256	55	11	29	6	13	15	88	98	60	178	38	26	25	32	24	21	49	84	39	499	123	9	82
Cluster A	0	0	0	0	0	2	0	0	6	0	5	1	0	0	0	0	0	0	0	0	0	0	0	0	0	0	0	0	0	0	0	0	0	2	1	0	0	0	0	0	0	0	0	0	1	0	2	0	0
Cluster B	2	0	0	0	1	1	1	0	20	86	5	2	54	10	2	16	4	24	2	8	6	1	2	0	2	28	41	1	0	0	0	0	0	4	1	2	10	4	1	5	9	14	0	2	1	4	34	1	4
Cluster C	0	0	0	0	0	0	0	0	0	0	0	0	0	0	0	0	0	0	0	0	0	0	0	0	0	0	0	0	0	0	0	0	0	0	0	0	0	0	0	0	0	0	0	0	0	0	4	0	0
Cluster D	0	0	0	0	0	0	1	8	2	0	10	0	0	0	0	0	0	0	0	0	0	0	0	0	0	0	0	0	0	0	0	0	2	1	3	0	0	0	0	0	1	0	0	0	0	0	0	0	0
Cluster E	0	0	0	0	0	0	0	0	0	0	0	0	0	0	0	0	0	0	0	0	0	0	0	0	0	0	0	0	0	0	0	0	0	0	0	0	0	0	0	0	0	0	0	0	0	0	0	0	0
A3I	0	0	0	0	0	0	0	0	0	0	0	0	0	0	0	0	0	0	0	0	0	0	0	0	0	0	0	0	0	0	0	0	0	0	0	0	0	0	0	0	0	0	0	0	0	0	0	0	0
Callithrix only	5	17	16	11	8	10	12	5	36	17	22	18	11	12	6	7	8	7	7	2	9	2	2	0	5	18	6	3	3	2	0	2	11	15	16	18	5	8	4	8	8	4	8	6	6	8	15	4	10
Callithrix only	0	0	1	0	0	2	1	0	153	43	69	0	0	0	1	0	2	0	0	0	0	0	0	0	2	0	4	0	0	0	0	0	0	9	0	0	0	0	1	0	0	0	0	0	0	0	3	0	0
Callithrix only	8	21	27	31	20	51	34	10	33	39	43	43	19	5	2	7	4	2	5	5	7	1	4	1	8	14	11	18	2	2	4	9	11	25	25	20	4	6	2	3	12	19	7	15	8	15	14	9	22
Aotus only
Saimiri only
Saimiri only
Saimiri only
Saimiri only
Cebus only
Cebus only
Table S2. Counts of perfect-matching unique reads of A3G copies in RNA-seq SRAs. Shared A3G copies are highlighted in green and species-restricted copies are highlighted in blue. ESC: embryonic stem cell; IPSC: induced pluripotent stem cell.
[truncated: 49 more columns]
